# Supplementary material
Source: PubMed Central journal article supplement (PMC2906329)
Supplement: supp_M109.096644_jbc.M109.096644-2.pdf [file supp_M109.096644_jbc.M109.096644-2.pdf]

**Supplemental Table 2****Cytokinin contents of Arabidopsis wild-type plants after cold treatment**

| Sample     | tZ        | tZR       | tZOG       | tZROG     | tZ9G      | tZR5'MP    |
|------------|-----------|-----------|------------|-----------|-----------|------------|
| Col-0 0h   | 1.54±0.34 | 1.31±0.45 | 15.07±0.58 | 1.38±0.16 | 5.32±0.80 | 10.96±1.78 |
| Col-0 0.5h | 1.58±0.32 | 0.99±0.24 | 14.38±3.02 | 1.37±0.29 | 4.76±0.89 | 9.93±2.25  |
| Col-0 1h   | 1.70±0.44 | 1.30±0.36 | 15.47±1.96 | 1.52±0.40 | 6.19±1.14 | 11.66±0.09 |
| Col-0 2h   | 2.13±0.57 | 1.75±0.52 | 19.40±3.20 | 1.96±0.50 | 5.66±0.29 | 15.88±2.83 |
| Col-0 4h   | 1.67±0.36 | 1.32±0.43 | 15.81±0.94 | 1.59±0.23 | 5.54±0.28 | 11.85±2.83 |
| Sample     | cZ        | cZR       | cZOG       | cZROG     | cZ9G      | cZR5'MP    |
| Col-0 0h   | 0.25±0.04 | 0.41±0.11 | 0.19±0.06  | 4.14±0.79 | 0.24±0.03 | 0.35±0.09  |
| Col-0 0.5h | 0.26±0.06 | 0.38±0.13 | 0.17±0.03  | 3.25±1.04 | 0.17±0.00 | 0.37±0.03  |
| Col-0 1h   | 0.21±0.02 | 0.42±0.11 | 0.21±0.01  | 4.13±0.42 | 0.26±0.08 | 0.40±0.05  |
| Col-0 2h   | 0.22±0.04 | 0.37±0.11 | 0.21±0.04  | 5.23±2.02 | 0.27±0.01 | 0.44±0.10  |
| Col-0 4h   | 0.16±0.03 | 0.31±0.04 | 0.20±0.04  | 2.94±1.04 | 0.23±0.03 | 0.36±0.02  |
| Sample     | DHZ       | DHZR      | DHZOG      | DHZROG    | DHZ9G     | DHZR5'MP   |
| Col-0 0h   | 0.01±0.00 | 0.02±0.01 | 0.42±0.11  | 0.10±0.03 | 0.07±0.01 | 0.17±0.03  |
| Col-0 0.5h | 0.01±0.00 | 0.02±0.00 | 0.32±0.06  | 0.13±0.04 | 0.06±0.02 | 0.15±0.01  |
| Col-0 1h   | 0.01±0.00 | 0.02±0.01 | 0.55±0.07  | 0.13±0.04 | 0.07±0.01 | 0.17±0.03  |
| Col-0 2h   | 0.02±0.01 | 0.04±0.01 | 0.41±0.08  | 0.18±0.05 | 0.08±0.02 | 0.18±0.03  |
| Col-0 4h   | 0.01±0.01 | 0.03±0.01 | 0.37±0.06  | 0.14±0.02 | 0.07±0.00 | 0.18±0.03  |
| Sample     | iP        | iPR       | iP9G       | iPR5'MP   |           |            |
| Col-0 0h   | 0.13±0.02 | 0.38±0.13 | 1.55±0.11  | 8.48±3.56 |           |            |
| Col-0 0.5h | 0.13±0.03 | 0.39±0.11 | 1.30±0.34  | 4.75±2.07 |           |            |
| Col-0 1h   | 0.14±0.02 | 0.34±0.08 | 1.69±0.29  | 7.24±2.07 |           |            |
| Col-0 2h   | 0.15±0.03 | 0.44±0.15 | 1.57±0.17  | 8.32±0.69 |           |            |
| Col-0 4h   | 0.13±0.02 | 0.48±0.05 | 1.59±0.27  | 7.60±2.67 |           |            |

One gram of *Arabidopsis* Col-0 seedlings (10 DAG) per sample was pooled, and three independent biological samples were taken for each treatment of cold temperature at 1°C. Data shown are mean (pmol/g fresh weight) ± SD. Statistically significant change with  $p < 0.05$  (Student's *t*-test) are in bold. tZ, *trans*-zeatin; tZR, *trans*-zeatin riboside; tZOG, *trans*-zeatin O-glucoside; tZROG, *trans*-zeatin riboside O-glucoside; tZ9G, *trans*-zeatin 9-glucoside; tZR5'MP, *trans*-zeatin riboside 5'-monophosphate; cZ, *cis*-zeatin; cZR, *cis*-zeatin riboside; cZOG, *cis*-zeatin O-glucoside; cZROG, *cis*-zeatin riboside O-glucoside; cZ9G, *cis*-zeatin 9-glucoside; cZR5'MP, *cis*-zeatin riboside 5'-monophosphate; DHZ, dihydrozeatin; DHZR, dihydrozeatin riboside; DHZOG, dihydrozeatin O-glucoside; DHZROG, dihydrozeatin riboside O-glucoside; DHZ9G, dihydrozeatin 9-glucoside; DHZR5'MP, dihydrozeatin riboside 5'-monophosphate; iP, N<sup>6</sup>-(Δ<sup>2</sup>isopentenyl)adenine; iPR, N<sup>6</sup>-(Δ<sup>2</sup>isopentenyl)adenosine; iP9G, N<sup>6</sup>-(Δ<sup>2</sup>isopentenyl)adenine 9-glucoside; iPRMP, N<sup>6</sup>-(Δ<sup>2</sup>isopentenyl)adenosine 5'-monophosphate.
