# Supplementary material
Source: PubMed Central journal article supplement (PMC2906329)
Supplement: supp_M109.096644_jbc.M109.096644-3.pdf [file supp_M109.096644_jbc.M109.096644-3.pdf]

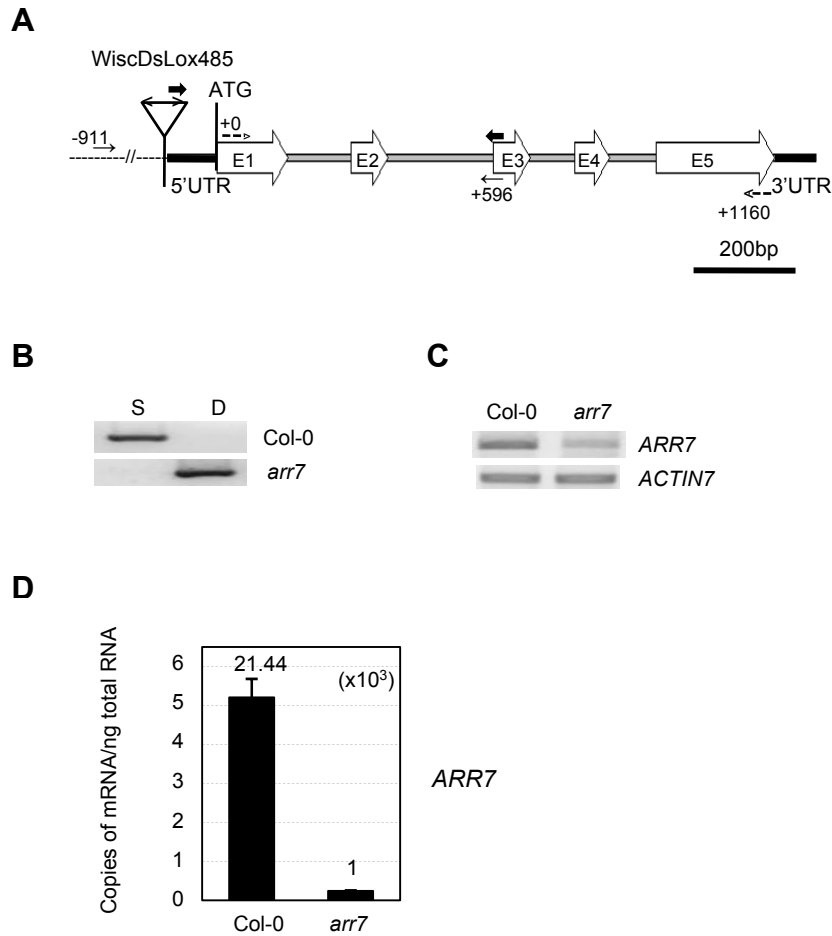

**Supplemental Fig. 1. Genotyping and RT-PCR analysis of *arr7* *Arabidopsis* mutants compared with the wild-type.** *A*, Location of *Ds* transposon insertion of *ARR7* in *Arabidopsis*. *Ds* insertion is indicated by triangle. *ARR7* is composed of five exons (E) and four introns indicated by a grey line. Untranslated region (UTR) is indicated by thick solid line. Thin solid arrows and thick solid arrows indicate the locations of the primers for the PCR of genomic *ARR7* DNA. Dotted arrows indicate the locations of the primers for RT-PCR of the *ARR7* mRNA. Numbers indicate the position of the first nucleotide of the primer relative to the AUG initiation codon. *arr7*: WiscDsLox485-488B15 (<http://www.hort.wisc.edu/krysan/2010/Default.htm>). *B*, PCR analysis of *Ds* transposon insertion mutants. Genomic DNA isolated was subjected to PCR with primers indicated in thick or thin arrows. S or D, PCR products amplified by specific primers (S, thin arrows) or *Ds* transposon primers (D, thick arrows). WT, wild-type Col-0. *C*, RT-PCR analysis of *Ds* transposon insertion mutants. Total RNA isolated from 7-day-old light-grown seedlings was subjected to RT-PCR with the primers indicated in dotted arrows. The *ACTIN7* mRNA was utilized as a loading control. *D*, Real-time RT-PCR analysis of the *ARR7* mRNA levels in *Ds* transposon insertion mutants compared with the wild-type. Copies of the transcripts from 7-day-old light-grown seedlings were plotted per ng total RNA after normalization to *ACTIN7* RNA. Multiplication of the number in the brackets inside the graph by the number in the y-axis generates copy numbers of the corresponding transcripts. Mean values and standard errors from biological triplicate experiments were plotted. Numbers on top of the bars indicate relative expression levels.

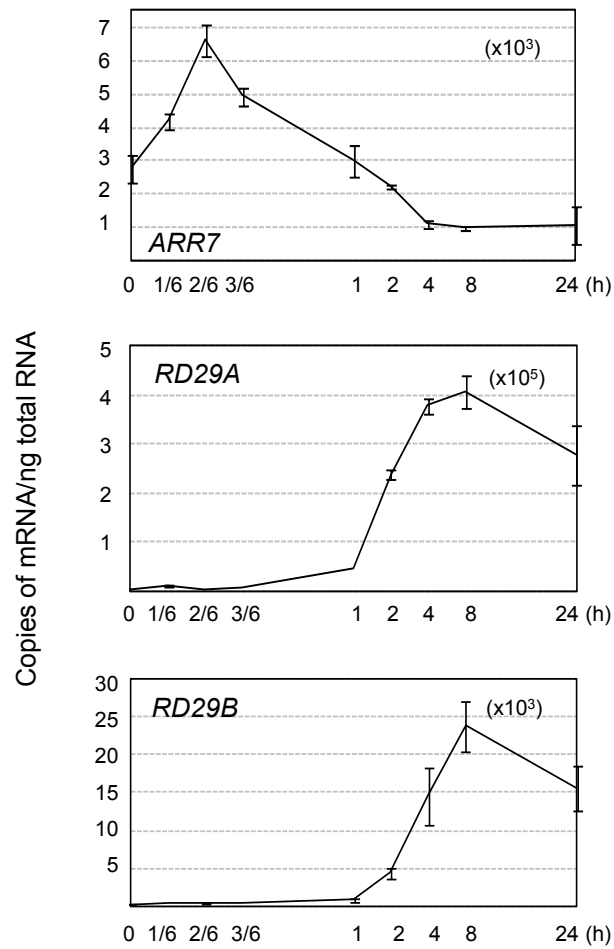

**Supplemental Fig. 2. Quantitative analysis of *ARR7* expression in response to high salinity.** Eleven-day-old seedlings were incubated with 300 mM NaCl in darkness for varying periods of time (h), analyzed, and shown as described in the Fig. 2 legend.

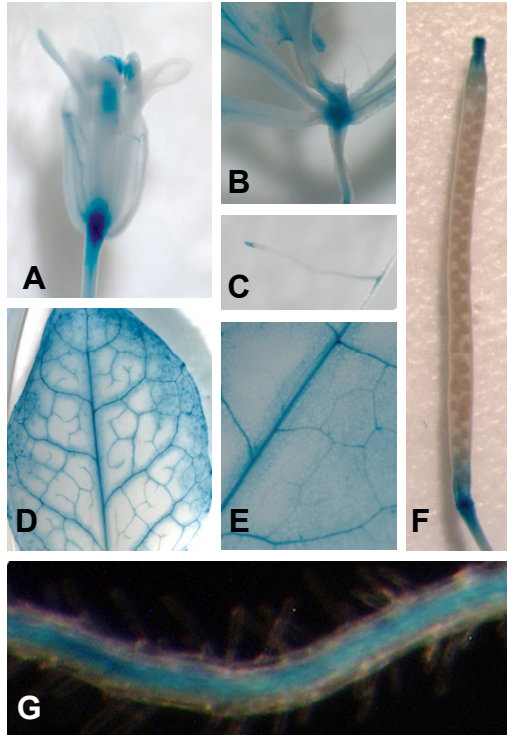

**Supplemental Fig. 3. Tissue expression pattern of *Pro<sub>ARR7</sub>:GUS* transgenics.** *A-G*, Tissue expression pattern of *Pro<sub>ARR7</sub>:GUS* in flower (*A*), shoot meristem (*B*), root meristem (*C*), rosette leaf (*D* and *E*), silique (*F*), and root (*G*).

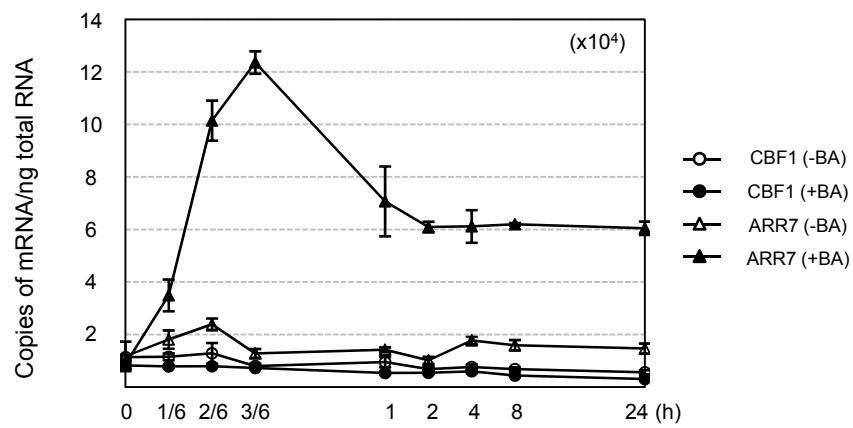

**Supplemental Fig. 4. Quantitative analysis of *CBF1* expression in response to cytokinin.** Eleven-day-old seedlings were incubated with cytokinin BA for varying periods of time (h), analyzed, and shown as described in the Fig. 2 legend. *ARR7* expression was monitored to verify the cytokinin response.

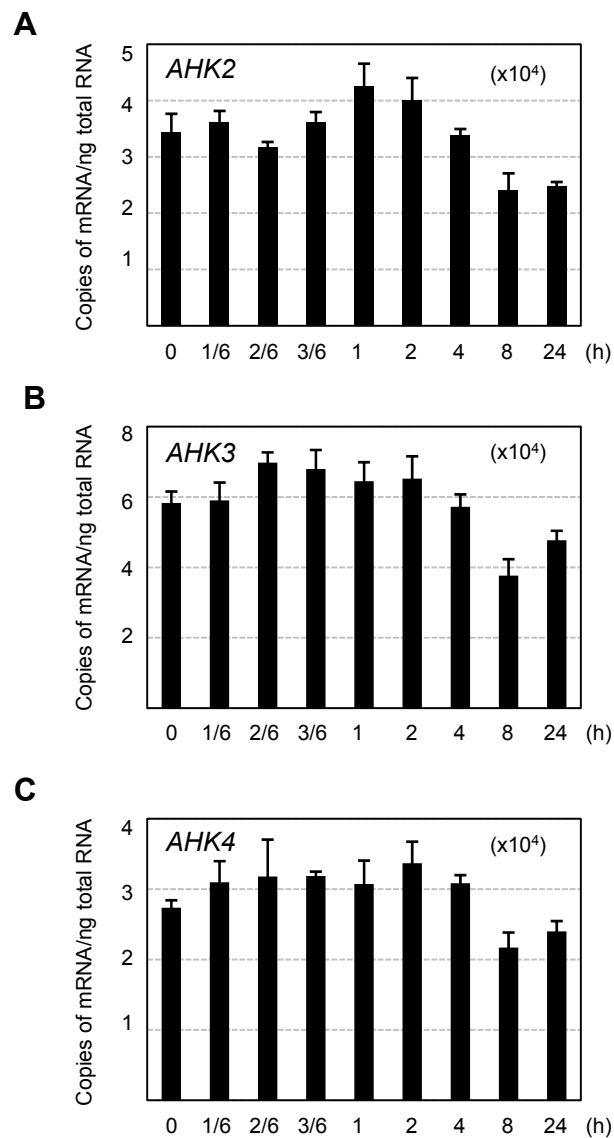

**Supplemental Fig. 5. Analysis of *AHK2*, *AHK3*, and *AHK4* expression in response to cold.** Eleven-day-old wild-type (Col-0) seedlings were incubated at 1 °C for varying periods of time (h). Total RNA isolated from each treatment was subjected to quantitative real-time RT-PCR with the primers for *AHK2* (A), *AHK3* (B), and *AHK4* (C). *ACTIN7* was utilized as a loading control. Copies of the transcripts from cold-treated plants treated with cold were plotted per ng of total RNA after normalization to *ACTIN7* RNA. The transcripts levels were determined as described in the Fig. 2 legend.

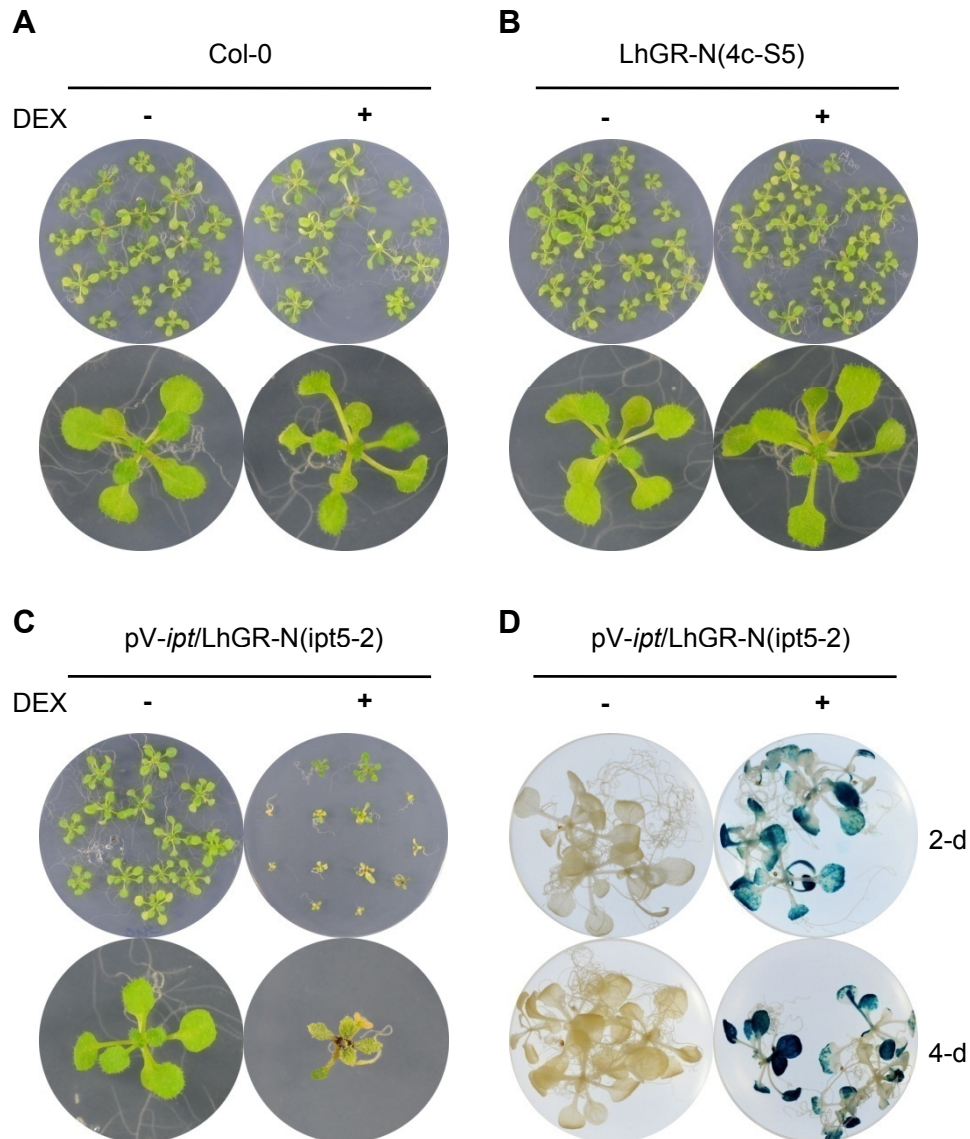

**Supplemental Fig. 6. Phenotype and GUS expression of *pV-ipt/LhGR-N* transgenic plants.** *A*, Col-0 wild-type plants treated with or without DEX. Plants were grown for 14 days without or with 10  $\mu$ M DEX. *B*, *LhGR-N* transgenic plants treated with or without DEX. Transgenic plants that contain activator construct expressing *LhGR* from the CaMV 35S promoter (39) were grown for 14 days without or with 10  $\mu$ M DEX. 4c-S5 indicates the line number of transgenic plants. GR indicates ligand binding domain of a rat glucocorticoid receptor at the amino terminus. Details on the constructs have been described previously (39). *C*, *pV-ipt/LhGR-N* transgenic plants treated with or without DEX. Transgenic plants that contain activator construct expressing *LhGR* and construct harboring *IPT* encoding isopentenyl transferase enzyme and *GUS* under six copies of ideal *lac* operator (39) were grown for 14 days without or with 10  $\mu$ M DEX. The treatment of DEX can lead to activation of *IPT* for cytokinin biosynthesis and *GUS*. ipt5-2 indicates the line number of transgenic plants. *D*, GUS staining of *pV-ipt/LhGR-N* transgenic plants treated with or without DEX. *pV-ipt/LhGR-N* transgenic plants were grown for 10 days and then treated without or with DEX for 2 days or 4 days, followed by GUS staining.

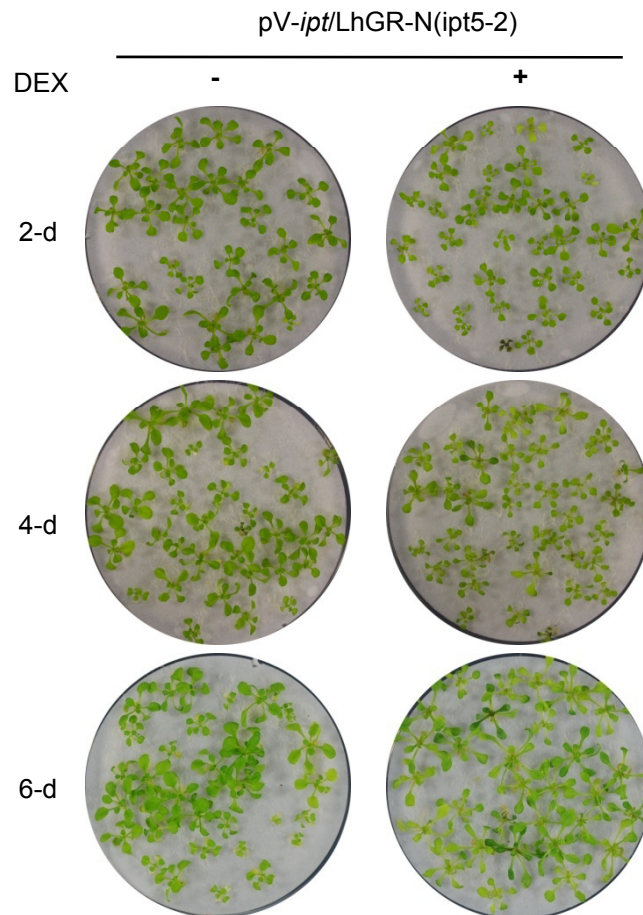

**Supplemental Fig. 7. The *pV-ipt/LhGR-N* transgenic plants treated with DEX.** The transgenic plants were grown in the light on sterile filter paper in MS plate for 10 days and transferred to MS plate with or without 10  $\mu$ M DEX. Plants were then incubated for additional 2, 4, or 6 days in the light. Pictures were taken before cold treatment at 1 °C.

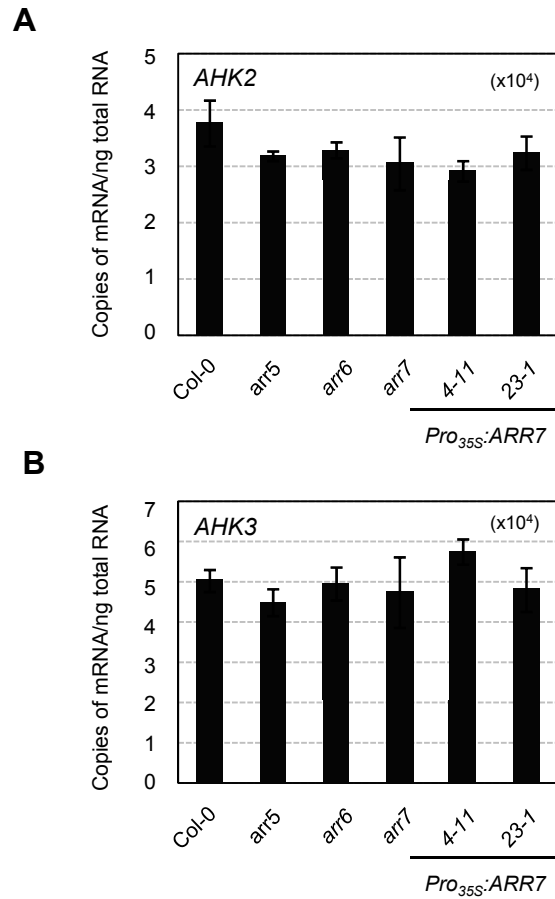

**Supplemental Fig. 8. Analysis of *AHK2* and *AHK3* expression in *arr5*, *6*, or *7* mutants and *Pro<sub>35S</sub>:ARR7*.** Total RNA isolated from eleven-day-old wild-type (Col-0) seedlings were subjected to quantitative real-time RT-PCR with the primers for *AHK2* (A) and *AHK3* (B). *ACTIN7* was utilized as a loading control. Copies of the transcripts from cold-treated plants treated with cold were plotted per ng of total RNA after normalization to *ACTIN7* RNA. The transcripts levels were determined as described in the Fig. 2 legend.
